# Supplementary material
Source: PubMed Central journal article supplement (PMC1459002)
Supplement: pnas_0602286103_4.pdf [file pnas_0602286103_4.pdf]

1362-13

|         |
|---------|
| A*02    |
| ....    |
| ....    |
| B*35    |
| ....    |
| ....    |
| DRB1*01 |
| ....    |
| ....    |

1362-14

|         |
|---------|
| A*01    |
| ....    |
| ....    |
| B*08    |
| ....    |
| ....    |
| DRB1*03 |
| ....    |
| ....    |

|         |
|---------|
| A*29    |
| ....    |
| ....    |
| B*44    |
| ....    |
| ....    |
| DRB1*01 |
| ....    |
| ....    |

|         |
|---------|
| A*26    |
| ....    |
| ....    |
| B*44    |
| ....    |
| ....    |
| DRB1*15 |
| ....    |
| ....    |

1362-15

|         |
|---------|
| A*01    |
| ....    |
| ....    |
| B*07    |
| ....    |
| ....    |
| DRB1*04 |
| ....    |
| ....    |

|         |
|---------|
| A*11    |
| ....    |
| ....    |
| B*51    |
| ....    |
| ....    |
| DRB1*04 |
| ....    |
| ....    |

1362-16

|         |
|---------|
| A*01    |
| ....    |
| ....    |
| B*08    |
| ....    |
| ....    |
| DRB1*15 |
| ....    |
| ....    |

|         |
|---------|
| A*01    |
| ....    |
| ....    |
| B*57    |
| ....    |
| ....    |
| DRB1*13 |
| ....    |
| ....    |

1362-01

|         |
|---------|
| A*02    |
| ....    |
| ....    |
| B*35    |
| ....    |
| ....    |
| DRB1*01 |
| ....    |
| ....    |

|         |
|---------|
| A*29    |
| ....    |
| ....    |
| B*44    |
| ....    |
| ....    |
| DRB1*01 |
| ....    |
| ....    |

HLA-A

|    |    |    |     |
|----|----|----|-----|
| E1 | E2 | E3 | E4  |
| E5 | E6 | J1 | J2  |
| J3 | J4 | J5 | J6  |
| J7 | J8 | J9 | J10 |

HLA-B

|     |      |      |     |
|-----|------|------|-----|
| 2K1 | 2K2  | 2K3  | 2K4 |
| 2K5 | 2K6  | 2K6  | 2K8 |
| 2K9 | 2K10 | 2K11 | 2D1 |
| 2D2 | 2D3  | 2D4  |     |

HLA-DRB1

|      |      |      |      |
|------|------|------|------|
| 108A | 108B | 108C | 108D |
| 108E | 108F | 108G | 108H |
| 108I | 161A | 161B | 161C |
| 161D | 161E | 161G | 161H |

1362-02

|         |
|---------|
| A*01    |
| ....    |
| ....    |
| B*07    |
| ....    |
| ....    |
| DRB1*04 |
| ....    |
| ....    |

|         |
|---------|
| A*01    |
| ....    |
| ....    |
| B*57    |
| ....    |
| ....    |
| DRB1*13 |
| ....    |
| ....    |

1362-03

|         |
|---------|
| A*29    |
| ....    |
| ....    |
| B*44    |
| ....    |
| ....    |
| DRB1*01 |
| ....    |
| ....    |

|         |
|---------|
| A*01    |
| ....    |
| ....    |
| B*57    |
| ....    |
| ....    |
| DRB1*13 |
| ....    |
| ....    |

1362-06

|         |
|---------|
| A*02    |
| ....    |
| ....    |
| B*35    |
| ....    |
| ....    |
| DRB1*01 |
| ....    |
| ....    |

|         |
|---------|
| A*01    |
| ....    |
| ....    |
| B*57    |
| ....    |
| ....    |
| DRB1*13 |
| ....    |
| ....    |

1362-07

|         |
|---------|
| A*29    |
| ....    |
| ....    |
| B*44    |
| ....    |
| ....    |
| DRB1*01 |
| ....    |
| ....    |

|         |
|---------|
| A*01    |
| ....    |
| ....    |
| B*07    |
| ....    |
| ....    |
| DRB1*04 |
| ....    |
| ....    |

1362-09

|         |
|---------|
| A*02    |
| ....    |
| ....    |
| B*35    |
| ....    |
| ....    |
| DRB1*01 |
| ....    |
| ....    |

|         |
|---------|
| A*01    |
| ....    |
| ....    |
| B*07    |
| ....    |
| ....    |
| DRB1*04 |
| ....    |
| ....    |
