# Supplementary material
Source: PubMed Central journal article supplement (PMC1459002)

**Sample 1**

**Sample 2**

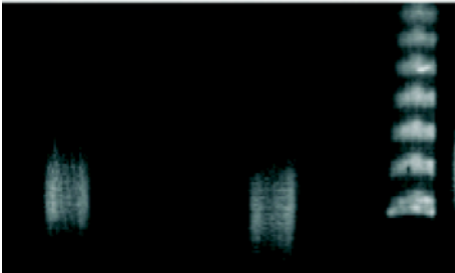

**8.4 Mb**

**7.2 Mb**

**6.0 Mb**

**4.8 Mb**

**3.6 Mb**

**2.4 Mb**

**1.2 Mb**

Supplement: pnas_0602286103_1.pdf [file pnas_0602286103_1.pdf]

1

2

3

4

5

6

2176 bp  
1766 bp  
1230 bp  
1033 bp  
653 bp  
517 bp  
453 bp  
394 bp  
298 bp  
234 bp  
154 bp

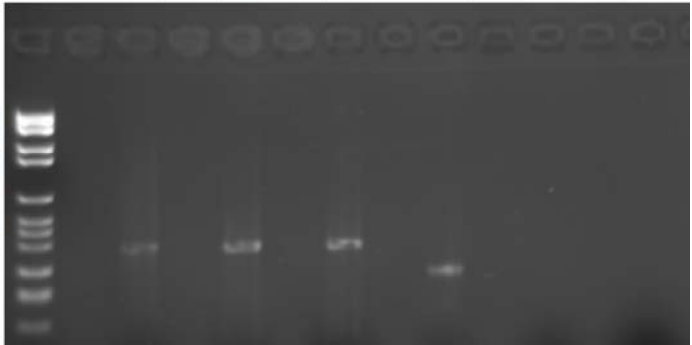

Supplement: pnas_0602286103_2.pdf [file pnas_0602286103_2.pdf]

HLA-B7 Allele

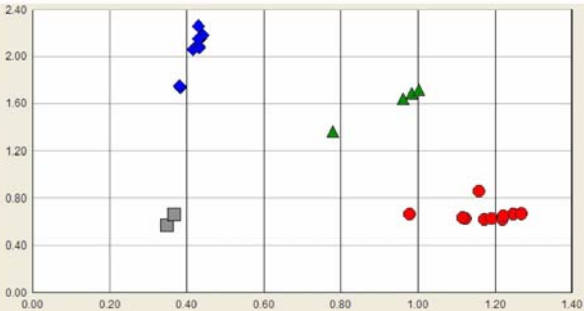

HLA-B8 Allele

Supplement: pnas_0602286103_3.pdf [file pnas_0602286103_3.pdf]
